# Supplementary material for: Concentrations of Essential Trace Metals in the Brain of Animal Species—A Comparative Study
Source: Brain Sci. 2020 Jul 17;10(7):460. doi: 10.3390/brainsci10070460 (PMC7407190; doi:10.3390/brainsci10070460)
Supplement: Supplementary file 1 [file brainsci-10-00460-s001.pdf]

## Supplementary material

**Table S1.** Method accuracy and precision checked by using the reference materials and comparing the results from the measurement with the certified values.

**(a) Reference Whole Blood Level 1 ( $n = 8$ ).**

| Element  | Measured          | Certified        |
|----------|-------------------|------------------|
|          | mg/kg             | mg/kg            |
| Zinc     | $5.0 \pm 0.79$    | 3.4–5.2          |
| Iron     | $441 \pm 42$      | 350 (indicative) |
| Copper   | $0.65 \pm 0.061$  | 0.51–0.76        |
| Selenium | $0.062 \pm 0.028$ | 0.048–0.072      |

**(b) Reference Serum Level 1 ( $n = 5$ ).**

| Element  | Measured           | Certified   |
|----------|--------------------|-------------|
|          | mg/kg              | mg/kg       |
| Zinc     | $1.6 \pm 0.24$     | 0.95–1.24   |
| Iron     | $1.2 \pm 0.72$     | 1.17–1.77   |
| Copper   | $1.0 \pm 0.053$    | 0.99–1.18   |
| Selenium | $0.070 \pm 0.0030$ | 0.076–0.099 |

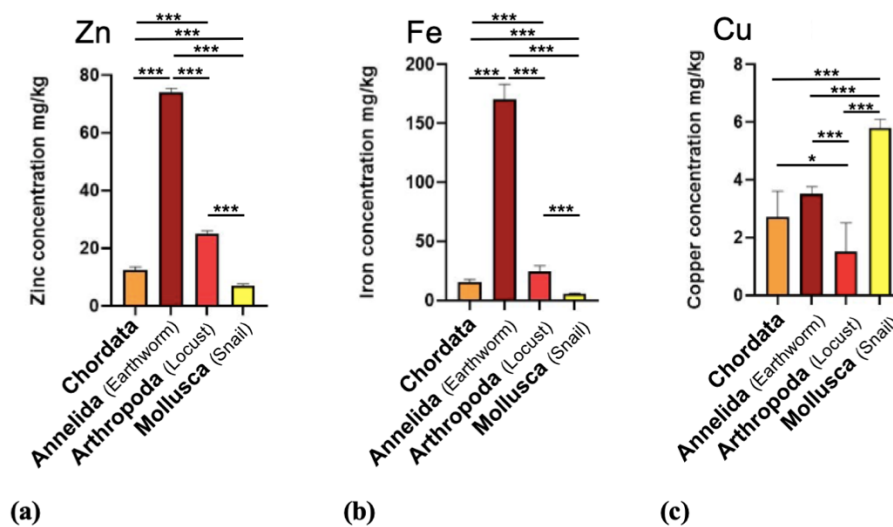

**Figure S1.** Trace metal levels analyzed in the brain tissues of animals belonging to the phyla Chordata, Annelida, Arthropoda and Mollusca. **(a)** Comparisons in zinc levels between Vertebrates and Invertebrates showed significant differences (Welch's ANOVA test  $p < 0.0001$ ). A Post-hoc test reveals that Chordata have significantly lower zinc levels in brain tissue when compared to a member of the phylum Annelida ( $p < 0.0001$ ) and Arthropoda ( $p < 0.0001$ ). However, the levels found in Chordata brain tissue are significantly higher than those in Mollusca (snail) ( $p < 0.0001$ ). **(b)** Iron levels are significantly different across members of the analyzed animal phyla (Welch's ANOVA test  $p < 0.0001$ ). Post-hoc analysis: Chordata vs. Annelida (earthworm) ( $p < 0.0001$ ), Chordata vs. Arthropoda (locust) ( $p = 0.0002$ ), Chordata vs. Mollusca (snail) ( $p < 0.0001$ ). As for zinc, Chordata have lower levels of iron than the members of the phyla Annelida and Arthropoda, but higher levels than Mollusca. **(c)** Copper levels are also significantly different between members of the phyla (Welch's ANOVA test  $p < 0.0001$ ). Post-hoc analysis reveals: Chordata vs. Arthropoda (locust) ( $p = 0.0164$ ), Chordata vs. Mollusca (snail) ( $p < 0.0001$ ). Thus, Chordata (averaged from pig, rat, mouse, fish) have higher copper levels than a member of the phylum Arthropoda (locust) but lower levels when compared to Mollusca (snail). Significances are stated with  $p$  values  $< 0.05$  \*;  $< 0.001$  \*\*\*.
